# Supplementary material for: Generation of a Predictive Melphalan Resistance Index by Drug Screen of B-Cell Cancer Cell Lines
Source: PubMed Central journal article supplement (PMC3084810; doi:10.1371/journal.pone.0019322), 2011-04-29

# Growth Inhibition for Cell Lines Treated with Melphalan

Replica

1 ▲ 2 ◆ 3 ■

$2^{-10}$   $2^{-5}$   $2^0$   $2^5$

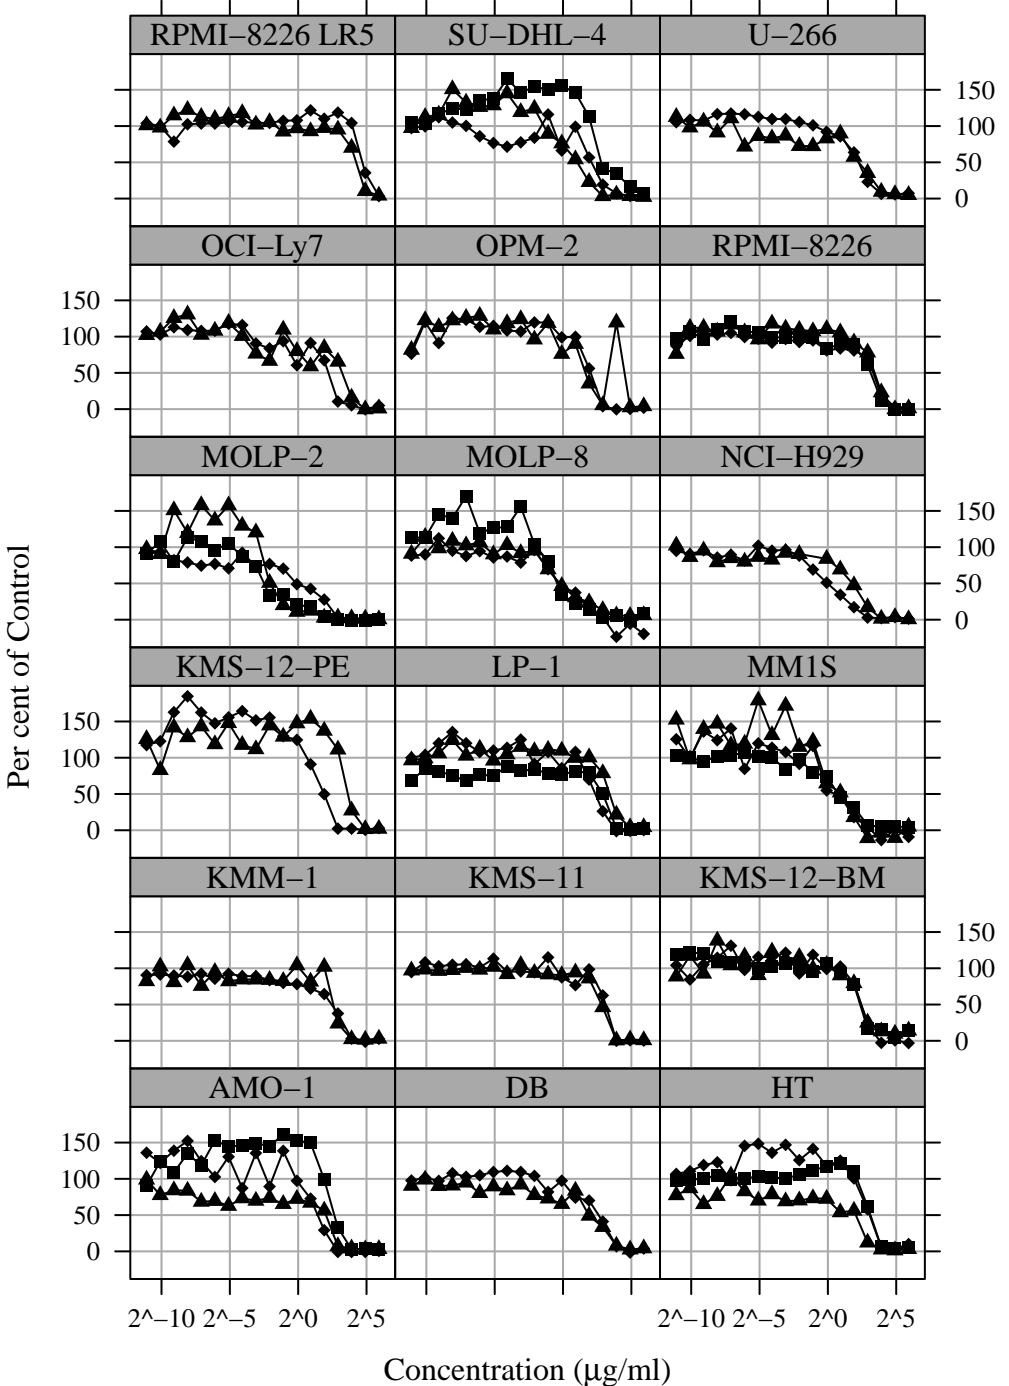

Supplement: pone.0019322.s001.pdf [file pone.0019322.s001.pdf]
