# Supplementary material for: Generation of a Predictive Melphalan Resistance Index by Drug Screen of B-Cell Cancer Cell Lines
Source: PubMed Central journal article supplement (PMC3084810; doi:10.1371/journal.pone.0019322), 2011-04-29
Supplement: pone.0019322.s002.pdf [file pone.0019322.s002.pdf]

# The NCI60 Melphalan Resistance Index

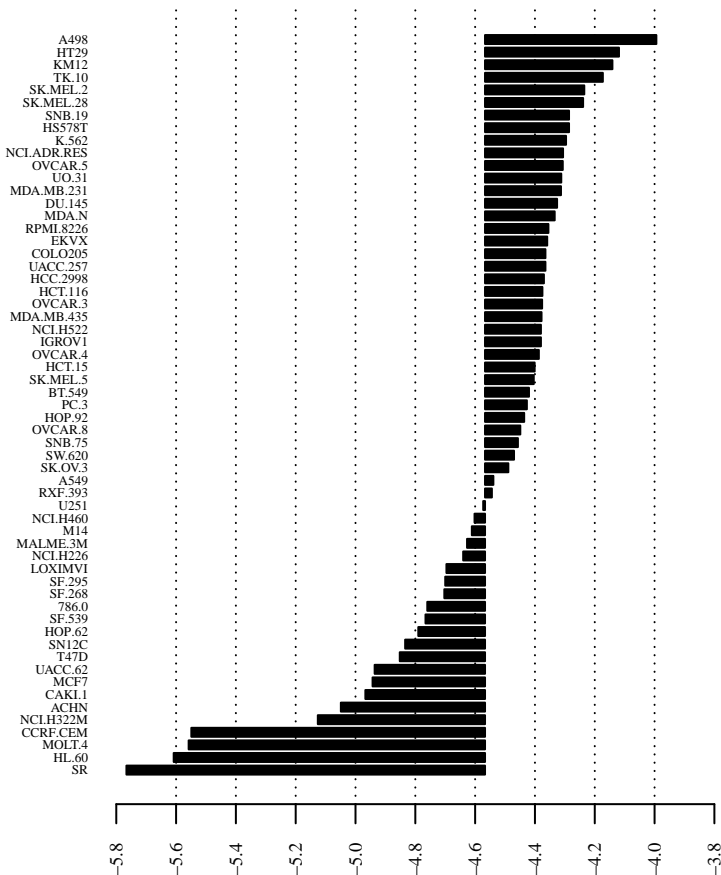

Log base 10 of the molar concentration
