# Supplementary material for: Generation of a Predictive Melphalan Resistance Index by Drug Screen of B-Cell Cancer Cell Lines
Source: PubMed Central journal article supplement (PMC3084810; doi:10.1371/journal.pone.0019322), 2011-04-29

# Arkansas BCell Kaplan–Meier EFS Curves

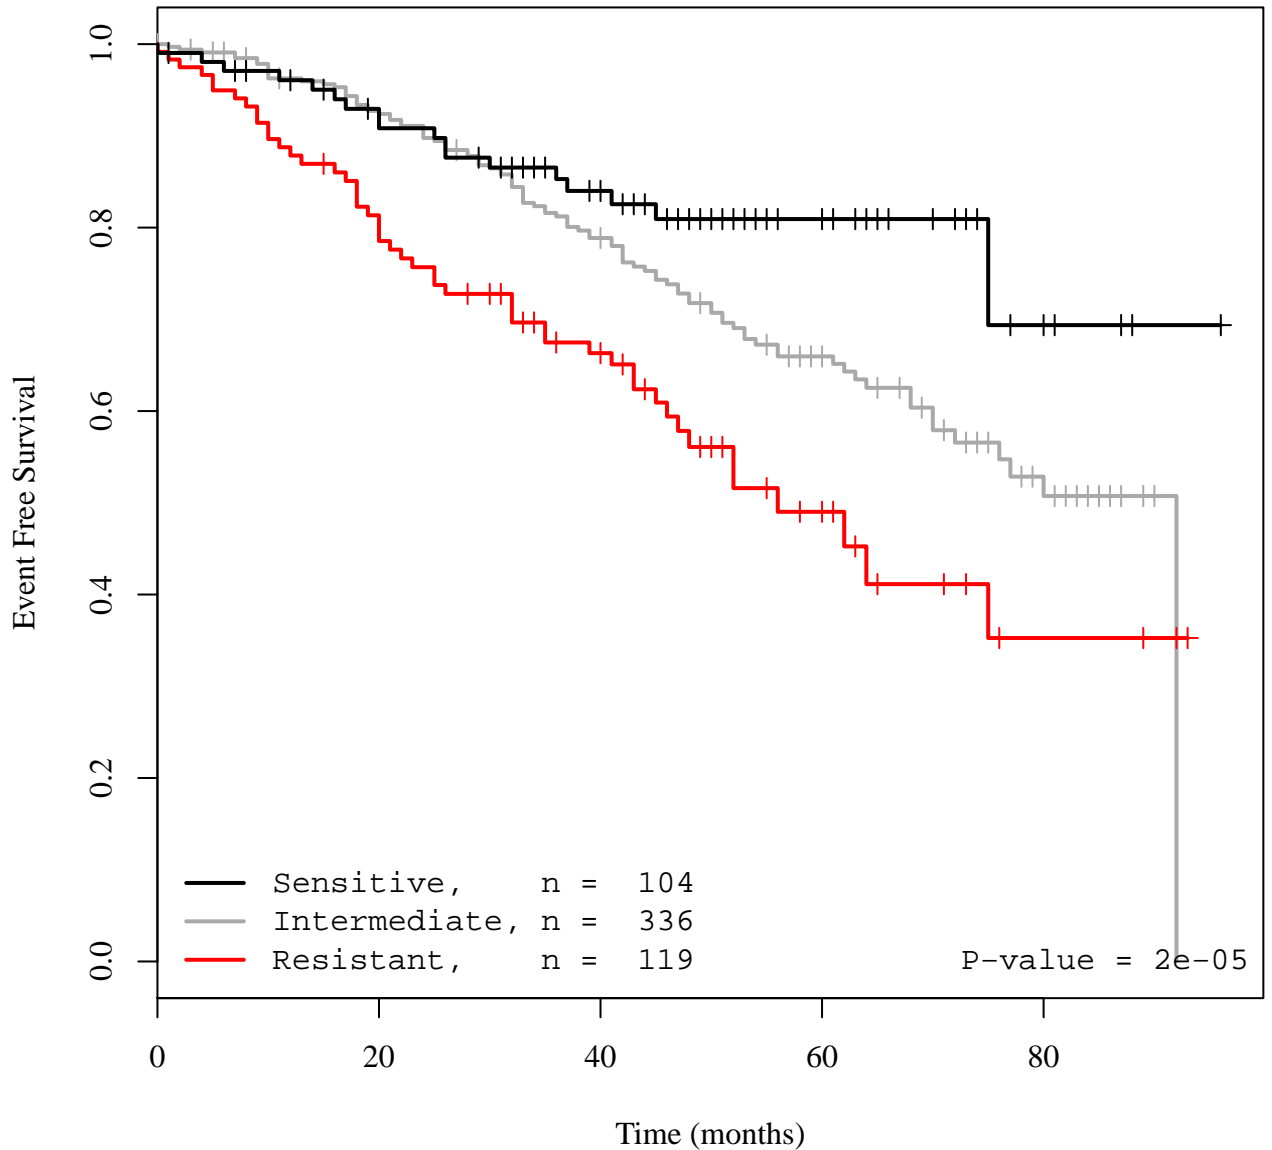

Supplement: pone.0019322.s011.pdf [file pone.0019322.s011.pdf]
