# Supplementary material for: Generation of a Predictive Melphalan Resistance Index by Drug Screen of B-Cell Cancer Cell Lines
Source: PubMed Central journal article supplement (PMC3084810; doi:10.1371/journal.pone.0019322), 2011-04-29
Supplement: pone.0019322.s016.pdf [file pone.0019322.s016.pdf]

**Table S1. Information about the BCell panel.**

| <b>Disease</b> | <b>Cell line</b> | <b>Medium</b>                                                       | <b>GI<sub>50</sub></b> |
|----------------|------------------|---------------------------------------------------------------------|------------------------|
| MM             | KMM-1            | RPMI-1640, 10% FBS                                                  | -4.7198                |
| MM             | KMS-11           | RPMI-1640, 10% FBS                                                  | -4.5848                |
| MM             | KMS-12-PE        | RPMI-1640, 20% FBS                                                  | -4.5612                |
| MM             | KMS-12-BM        | RPMI-1640, 20% FBS                                                  | -4.7596                |
| MM             | LP-1             | IMDM, 10% FBS                                                       | -4.5975                |
| MM             | MM1S             | RPMI-1640, 10% FBS                                                  | -5.2443                |
| MM             | MOLP-2           | RPMI-1640, 10% FBS                                                  | -6.0210                |
| MM             | MOLP-8           | RPMI-1640, 20% FBS                                                  | -5.5889                |
| MM             | NCI-H929         | RPMI-1640, 20% FBS,<br>2 mM L-glutamine,<br>1 mM sodium-pyruvate    | -5.1836                |
| MM             | OPM-2            | RPMI-1640, 10% FBS                                                  | -4.9366                |
| MM             | RPMI-8226        | RPMI-1640, 10% FBS                                                  | -4.4932                |
| MM             | RPMI-8226 LR5    | RPMI-1640, 10% FBS,<br>5 $\mu$ M melphalan<br>was added once a week | -4.1343                |
| MM             | U-266            | RPMI-1640, 10% FBS                                                  | -4.8088                |
| PC             | AMO-1            | RPMI-1640, 20% FBS                                                  | -4.8391                |
| DLBCL          | DB               | RPMI-1640, 20% FBS                                                  | -4.7802                |
| DLBCL          | HT               | RPMI-1640, 10% FBS                                                  | -4.6502                |
| DLBCL          | OCI-Ly7          | RPMI-1640, 10% FBS                                                  | -4.7053                |
| DLBCL          | SU-DHL-4         | RPMI-1640, 10% FBS                                                  | -4.8111                |

Abbreviations: multiple myeloma (MM), plasmacytoma (PC), diffuse large B-cell lymphoma (DL-BCL), fetal bovine serum (FBS). GI<sub>50</sub>-values are on log<sub>10</sub>  $\mu$ M/ml scale.
