# Supplementary material for: Generation of a Predictive Melphalan Resistance Index by Drug Screen of B-Cell Cancer Cell Lines
Source: PubMed Central journal article supplement (PMC3084810; doi:10.1371/journal.pone.0019322), 2011-04-29
Supplement: pone.0019322.s017.pdf [file pone.0019322.s017.pdf]

**Table S2. A summary of the 159 gene expressions used in the BCell LDA classifier.**

| Probesets   | Symbol   | AveExpr    | F     | P.Value  | adj.P.Val |
|-------------|----------|------------|-------|----------|-----------|
| 209310_s_at | CASP4    | 2.282e-16  | 6.343 | 0.001759 | 0.1572    |
| 221004_s_at | ITM2C    | -2.722e-16 | 6.245 | 0.00194  | 0.1572    |
| 221912_s_at | CCDC28B  | -1.258e-16 | 6.139 | 0.002158 | 0.1572    |
| 209735_at   | ABCG2    | -8.481e-17 | 5.973 | 0.002545 | 0.1572    |
| 221297_at   | GPRC5D   | 2.564e-17  | 5.863 | 0.002843 | 0.1572    |
| 206060_s_at | PTPN22   | 1.627e-16  | 5.853 | 0.002872 | 0.1572    |
| 210145_at   | PLA2G4A  | -1.388e-17 | 5.676 | 0.003427 | 0.1572    |
| 218330_s_at | NAV2     | -1.496e-16 | 5.673 | 0.003438 | 0.1572    |
| 209568_s_at | RGL1     | -2.619e-16 | 5.652 | 0.003512 | 0.1572    |
| 212543_at   | AIM1     | 1.103e-16  | 5.51  | 0.004046 | 0.1572    |
| 200602_at   | APP      | 5.089e-17  | 5.246 | 0.005266 | 0.1572    |
| 221268_s_at | SGPP1    | 1.588e-16  | 5.236 | 0.00532  | 0.1572    |
| 205807_s_at | TUFT1    | -1.82e-16  | 5.179 | 0.005635 | 0.1572    |
| 203758_at   | CTSO     | 6.014e-17  | 5.131 | 0.005908 | 0.1572    |
| 204552_at   | INPP4A   | 2.806e-16  | 5.117 | 0.005996 | 0.1572    |
| 201125_s_at | ITGB5    | -4.715e-16 | 5.089 | 0.006163 | 0.1572    |
| 210942_s_at | ST3GAL6  | -5.204e-17 | 5.081 | 0.006216 | 0.1572    |
| 206121_at   | AMPD1    | -7.859e-17 | 5.053 | 0.006393 | 0.1572    |
| 222258_s_at | SH3BP4   | -1.218e-16 | 5.032 | 0.006529 | 0.1572    |
| 219572_at   | CADPS2   | -3.547e-17 | 4.992 | 0.006795 | 0.1572    |
| 211368_s_at | CASP1    | 4.163e-17  | 4.929 | 0.007237 | 0.1572    |
| 34210_at    | CD52     | -5.551e-17 | 4.916 | 0.007325 | 0.1572    |
| 202551_s_at | CRIM1    | -1.349e-16 | 4.91  | 0.007374 | 0.1572    |
| 202947_s_at | GYPC     | -1.588e-16 | 4.866 | 0.007705 | 0.1572    |
| 212886_at   | CCDC69   | 3.915e-16  | 4.857 | 0.007771 | 0.1572    |
| 205016_at   | TGFA     | -6.818e-17 | 4.85  | 0.007827 | 0.1572    |
| 209163_at   | CYB561   | 4.795e-18  | 4.827 | 0.008014 | 0.1572    |
| 219191_s_at | BIN2     | 1.11e-16   | 4.81  | 0.008145 | 0.1572    |
| 210279_at   | GPR18    | -1.388e-16 | 4.801 | 0.008222 | 0.1572    |
| 218793_s_at | SCML1    | 1.295e-16  | 4.77  | 0.008479 | 0.1572    |
| 205110_s_at | FGF13    | 2.467e-17  | 4.755 | 0.008606 | 0.1572    |
| 214023_x_at | TUBB2B   | -1.068e-16 | 4.646 | 0.009601 | 0.1572    |
| 202609_at   | EPS8     | -2.66e-17  | 4.643 | 0.009632 | 0.1572    |
| 221526_x_at | PARD3    | 1.665e-16  | 4.634 | 0.009717 | 0.1572    |
| 221645_s_at | ZNF83    | 7.922e-17  | 4.612 | 0.009929 | 0.1572    |
| 221704_s_at | VPS37B   | -2.321e-16 | 4.585 | 0.0102   | 0.1572    |
| 219221_at   | ZBTB38   | 3.296e-16  | 4.567 | 0.01039  | 0.1572    |
| 212715_s_at | MICAL3   | 1.759e-16  | 4.555 | 0.01051  | 0.1572    |
| 213415_at   | CLIC2    | 7.71e-17   | 4.534 | 0.01073  | 0.1572    |
| 222317_at   | PDE3B    | 5.474e-17  | 4.52  | 0.01088  | 0.1572    |
| 206698_at   | XK       | -1.48e-16  | 4.508 | 0.01102  | 0.1572    |
| 202732_at   | PKIG     | -2.313e-18 | 4.485 | 0.01128  | 0.1572    |
| 200660_at   | S100A11  | 2.012e-16  | 4.463 | 0.01153  | 0.1572    |
| 218723_s_at | C13orf15 | -7.556e-17 | 4.444 | 0.01175  | 0.1572    |
| 204730_at   | RIMS3    | -2.506e-16 | 4.44  | 0.0118   | 0.1572    |

Table 1: (continued)

| Probesets   | Symbol   | AveExpr    | F     | P.Value | adj.P.Val |
|-------------|----------|------------|-------|---------|-----------|
| 212588_at   | PTPRC    | -9.252e-17 | 4.381 | 0.01251 | 0.1572    |
| 204589_at   | NUAK1    | -1.82e-16  | 4.379 | 0.01254 | 0.1572    |
| 207826_s_at | ID3      | -3.77e-16  | 4.369 | 0.01266 | 0.1572    |
| 212195_at   | IL6ST    | 1.261e-16  | 4.364 | 0.01273 | 0.1572    |
| 222150_s_at | PION     | -9.714e-17 | 4.363 | 0.01273 | 0.1572    |
| 218080_x_at | FAF1     | 5.158e-16  | 4.352 | 0.01288 | 0.1572    |
| 212724_at   | RND3     | -1.542e-16 | 4.34  | 0.01303 | 0.1572    |
| 203932_at   | HLA-DMB  | -2.105e-16 | 4.332 | 0.01314 | 0.1572    |
| 214890_s_at | FAM149A  | -2.393e-16 | 4.276 | 0.0139  | 0.1612    |
| 201301_s_at | ANXA4    | -3.847e-16 | 4.256 | 0.01418 | 0.1612    |
| 213325_at   | PVRL3    | -2.409e-16 | 4.228 | 0.01458 | 0.1612    |
| 219159_s_at | SLAMF7   | -8.635e-17 | 4.22  | 0.0147  | 0.1612    |
| 221727_at   | SUB1     | 2.799e-16  | 4.204 | 0.01494 | 0.1612    |
| 209829_at   | FAM65B   | 9.56e-17   | 4.179 | 0.01531 | 0.1612    |
| 202371_at   | TCEAL4   | -2.066e-16 | 4.177 | 0.01535 | 0.1612    |
| 221942_s_at | GUCY1A3  | 1.581e-16  | 4.165 | 0.01553 | 0.1612    |
| 201998_at   | ST6GAL1  | -2.891e-17 | 4.14  | 0.01592 | 0.1612    |
| 202746_at   | ITM2A    | 3.084e-18  | 4.134 | 0.01602 | 0.1612    |
| 207307_at   | HTR2C    | 1.673e-16  | 4.104 | 0.01651 | 0.1635    |
| 201063_at   | RCN1     | 5.86e-17   | 4.041 | 0.01758 | 0.1677    |
| 204613_at   | PLCG2    | 4.24e-18   | 4.024 | 0.01789 | 0.1677    |
| 214608_s_at | EYA1     | -3.392e-17 | 4.019 | 0.01798 | 0.1677    |
| 202096_s_at | TSPO     | -4.572e-16 | 3.979 | 0.01871 | 0.1677    |
| 203795_s_at | BCL7A    | -1.542e-16 | 3.955 | 0.01916 | 0.1677    |
| 212192_at   | KCTD12   | -1.295e-16 | 3.948 | 0.01929 | 0.1677    |
| 213502_x_at | LOC91316 | 1.465e-16  | 3.938 | 0.01948 | 0.1677    |
| 202177_at   | GAS6     | -2.853e-17 | 3.938 | 0.01949 | 0.1677    |
| 209348_s_at | MAF      | -4.626e-17 | 3.935 | 0.01955 | 0.1677    |
| 218409_s_at | DNAJC1   | 2.467e-17  | 3.929 | 0.01966 | 0.1677    |
| 205945_at   | IL6R     | -2.082e-16 | 3.92  | 0.01984 | 0.1677    |
| 200706_s_at | LITAF    | -4.179e-16 | 3.883 | 0.02058 | 0.1685    |
| 212442_s_at | LASS6    | 1.727e-16  | 3.882 | 0.02061 | 0.1685    |
| 213245_at   | ADCY1    | -1.295e-16 | 3.876 | 0.02073 | 0.1685    |
| 201681_s_at | DLG5     | 1.798e-16  | 3.828 | 0.02176 | 0.1709    |
| 201212_at   | LGMN     | -1.557e-16 | 3.785 | 0.02271 | 0.1709    |
| 201841_s_at | HSPB1    | -4.125e-16 | 3.765 | 0.02316 | 0.1709    |
| 202933_s_at | YES1     | 1.773e-16  | 3.751 | 0.0235  | 0.1709    |
| 206641_at   | TNFRSF17 | 2.603e-16  | 3.745 | 0.02364 | 0.1709    |
| 203986_at   | STBD1    | -1.226e-16 | 3.741 | 0.02373 | 0.1709    |
| 208892_s_at | DUSP6    | -7.864e-17 | 3.731 | 0.02396 | 0.1709    |
| 200824_at   | GSTP1    | -1.11e-16  | 3.712 | 0.02443 | 0.1709    |
| 205229_s_at | COCH     | 1.382e-16  | 3.685 | 0.02509 | 0.1709    |
| 219696_at   | DENND1B  | -3.369e-16 | 3.681 | 0.0252  | 0.1709    |
| 217995_at   | SQRDL    | -1.661e-16 | 3.678 | 0.02526 | 0.1709    |
| 209198_s_at | SYT11    | 1.885e-16  | 3.671 | 0.02546 | 0.1709    |
| 205718_at   | ITGB7    | -3.115e-16 | 3.661 | 0.02571 | 0.1709    |

Table 1: (continued)

| Probesets   | Symbol   | AveExpr    | F     | P.Value | adj.P.Val |
|-------------|----------|------------|-------|---------|-----------|
| 203476_at   | TPBG     | 5.86e-17   | 3.659 | 0.02575 | 0.1709    |
| 204960_at   | PTPRCAP  | 2.205e-16  | 3.657 | 0.0258  | 0.1709    |
| 203411_s_at | LMNA     | 2.209e-16  | 3.649 | 0.02601 | 0.1709    |
| 200839_s_at | CTSB     | 1.577e-16  | 3.625 | 0.02665 | 0.1709    |
| 209340_at   | UAP1     | -3.3e-16   | 3.624 | 0.02666 | 0.1709    |
| 218404_at   | SNX10    | -1.847e-16 | 3.621 | 0.02677 | 0.1709    |
| 219010_at   | C1orf106 | -3.481e-16 | 3.615 | 0.02691 | 0.1709    |
| 219551_at   | EAF2     | 5.196e-16  | 3.612 | 0.027   | 0.1709    |
| 205943_at   | TDO2     | -1.279e-16 | 3.61  | 0.02705 | 0.1709    |
| 212096_s_at | MTUS1    | 1.789e-16  | 3.594 | 0.02748 | 0.1709    |
| 207039_at   | CDKN2A   | -2.101e-17 | 3.594 | 0.02749 | 0.1709    |
| 204254_s_at | VDR      | -2.39e-17  | 3.565 | 0.02829 | 0.1741    |
| 202242_at   | TSPAN7   | 2.136e-16  | 3.543 | 0.02892 | 0.1763    |
| 202136_at   | ZMYND11  | -2.375e-16 | 3.522 | 0.02955 | 0.1764    |
| 218847_at   | IGF2BP2  | 1.342e-16  | 3.52  | 0.02961 | 0.1764    |
| 212843_at   | NCAM1    | -3.286e-17 | 3.499 | 0.03021 | 0.1764    |
| 218718_at   | PDGFC    | -9.252e-18 | 3.495 | 0.03035 | 0.1764    |
| 201647_s_at | SCARB2   | 1.519e-16  | 3.48  | 0.03079 | 0.1764    |
| 200697_at   | HK1      | 3.84e-16   | 3.463 | 0.03134 | 0.1764    |
| 209619_at   | CD74     | -1.058e-16 | 3.458 | 0.0315  | 0.1764    |
| 203397_s_at | GALNT3   | -8.481e-17 | 3.457 | 0.03152 | 0.1764    |
| 201828_x_at | FAM127A  | -5.089e-16 | 3.451 | 0.03172 | 0.1764    |
| 60474_at    | FERMT1   | -1.164e-16 | 3.441 | 0.03202 | 0.1764    |
| 221122_at   | HRASLS2  | 2.567e-16  | 3.433 | 0.03229 | 0.1764    |
| 204688_at   | SGCE     | -3.701e-16 | 3.431 | 0.03236 | 0.1764    |
| 212097_at   | CAV1     | -7.71e-18  | 3.41  | 0.03304 | 0.1764    |
| 217967_s_at | FAM129A  | 1.664e-16  | 3.41  | 0.03306 | 0.1764    |
| 202946_s_at | BTBD3    | -7.633e-17 | 3.407 | 0.03314 | 0.1764    |
| 206632_s_at | APOBEC3B | -2.018e-16 | 3.393 | 0.03362 | 0.1764    |
| 219003_s_at | MANEA    | -3.192e-16 | 3.367 | 0.03448 | 0.1764    |
| 205903_s_at | KCNN3    | -3.3e-16   | 3.366 | 0.03452 | 0.1764    |
| 206700_s_at | KDM5D    | 1.419e-16  | 3.363 | 0.03464 | 0.1764    |
| 218974_at   | SOBP     | -2.213e-16 | 3.359 | 0.03478 | 0.1764    |
| 206609_at   | MAGEC1   | 1.288e-16  | 3.359 | 0.03479 | 0.1764    |
| 205297_s_at | CD79B    | -1.766e-16 | 3.317 | 0.03625 | 0.1802    |
| 205933_at   | SETBP1   | 1.195e-17  | 3.314 | 0.03635 | 0.1802    |
| 202388_at   | RGS2     | -2.22e-16  | 3.31  | 0.03652 | 0.1802    |
| 201462_at   | SCRN1    | -4.163e-17 | 3.293 | 0.03716 | 0.1802    |
| 203167_at   | TIMP2    | 4.318e-17  | 3.284 | 0.03747 | 0.1802    |
| 205098_at   | CCR1     | -9.252e-17 | 3.277 | 0.03772 | 0.1802    |
| 219014_at   | PLAC8    | 1.48e-16   | 3.272 | 0.03792 | 0.1802    |
| 214452_at   | BCAT1    | -1.593e-16 | 3.271 | 0.03795 | 0.1802    |
| 202017_at   | EPHX1    | -1.218e-16 | 3.268 | 0.03808 | 0.1802    |
| 210473_s_at | GPR125   | -1.511e-16 | 3.247 | 0.0389  | 0.1827    |
| 204409_s_at | EIF1AY   | 1.234e-17  | 3.233 | 0.03944 | 0.183     |
| 220603_s_at | MCTP2    | 6.63e-17   | 3.225 | 0.03975 | 0.183     |

Table 1: (*continued*)

| Probesets   | Symbol   | AveExpr    | F     | P.Value | adj.P.Val |
|-------------|----------|------------|-------|---------|-----------|
| 212345_s.at | CREB3L2  | -2.831e-16 | 3.208 | 0.04044 | 0.183     |
| 203710_at   | ITPR1    | -5.551e-17 | 3.208 | 0.04045 | 0.183     |
| 200999_s.at | CKAP4    | -1.82e-16  | 3.203 | 0.04066 | 0.183     |
| 204923_at   | SASH3    | -1.542e-17 | 3.202 | 0.04069 | 0.183     |
| 204364_s.at | REEP1    | -1.739e-16 | 3.155 | 0.04263 | 0.1894    |
| 218618_s.at | FNDC3B   | 3.523e-16  | 3.153 | 0.04272 | 0.1894    |
| 203324_s.at | CAV2     | -5.86e-17  | 3.143 | 0.04316 | 0.1895    |
| 211105_s.at | NFATC1   | -5.86e-17  | 3.136 | 0.04346 | 0.1895    |
| 220306_at   | FAM46C   | -4.042e-16 | 3.132 | 0.04364 | 0.1895    |
| 213135_at   | TIAM1    | 9.213e-17  | 3.118 | 0.04424 | 0.1896    |
| 206624_at   | USP9Y    | 2.56e-16   | 3.116 | 0.04432 | 0.1896    |
| 211373_s.at | PSEN2    | 9.059e-17  | 3.106 | 0.04478 | 0.1896    |
| 206167_s.at | ARHGAP6  | -3.547e-17 | 3.096 | 0.04522 | 0.1896    |
| 201858_s.at | SRGN     | 6.091e-17  | 3.095 | 0.04529 | 0.1896    |
| 201540_at   | FHL1     | -1.735e-16 | 3.088 | 0.04557 | 0.1896    |
| 218450_at   | HEBP1    | -1.156e-16 | 3.085 | 0.04575 | 0.1896    |
| 213913_s.at | TBC1D30  | -1.372e-16 | 3.067 | 0.04654 | 0.1916    |
| 217551_at   | OR7E14P  | -1.11e-16  | 3.039 | 0.04789 | 0.1946    |
| 221666_s.at | PYCARD   | 5.705e-17  | 3.039 | 0.04789 | 0.1946    |
| 214131_at   | CYorf15B | -6.168e-17 | 3.032 | 0.04822 | 0.1947    |
| 219812_at   | PVRIG    | 1.372e-16  | 3.005 | 0.04954 | 0.1983    |
| 213478_at   | KAZ      | 2.282e-16  | 2.999 | 0.04985 | 0.1983    |
