# Supplementary material for: Generation of a Predictive Melphalan Resistance Index by Drug Screen of B-Cell Cancer Cell Lines
Source: PubMed Central journal article supplement (PMC3084810; doi:10.1371/journal.pone.0019322), 2011-04-29
Supplement: pone.0019322.s018.pdf [file pone.0019322.s018.pdf]

**Table S3. Table of the gene expressions used in the two cell line resistance index.**

| U133a ID    | Gene Symbol | Weight | U133a ID    | Gene Symbol | Weight |
|-------------|-------------|--------|-------------|-------------|--------|
| 205174_s_at | QPCT        | -7.893 | 210942_s_at | ST3GAL6     | 5.596  |
| 205590_at   | RASGRP1     | -7.89  | 215189_at   | KRT86       | 5.599  |
| 213831_at   | HLA-DQA1    | -7.591 | 212473_s_at | MICAL2      | 5.687  |
| 212122_at   | RHOQ        | -7.303 | 209735_at   | ABCG2       | 5.69   |
| 210587_at   | INHBE       | -7.032 | 218502_s_at | TRPS1       | 5.717  |
| 39248_at    | AQP3        | -6.988 | 214023_x_at | TUBB2B      | 5.721  |
| 205990_s_at | WNT5A       | -6.854 | 212724_at   | RND3        | 5.752  |
| 202609_at   | EPS8        | -6.797 | 203474_at   | IQGAP2      | 5.767  |
| 219159_s_at | SLAMF7      | -6.793 | 204014_at   | DUSP4       | 5.772  |
| 213938_at   | ERC2        | -6.724 | 213524_s_at | G0S2        | 5.774  |
| 204118_at   | CD48        | -6.706 | 217996_at   | PHLDA1      | 5.797  |
| 207191_s_at | ISLR        | -6.422 | 206897_at   | PAGE1       | 5.824  |
| 205801_s_at | RASGRP3     | -6.387 | 218736_s_at | PALMD       | 5.835  |
| 212998_x_at | HLA-DQB1    | -6.351 | 204734_at   | KRT15       | 5.978  |
| 212063_at   | CD44        | -6.321 | 214039_s_at | LAPTM4B     | 6.004  |
| 220132_s_at | CLEC2D      | -6.251 | 204533_at   | CXCL10      | 6.053  |
| 221558_s_at | LEF1        | -6.186 | 205098_at   | CCR1        | 6.107  |
| 219073_s_at | OSBPL10     | -6.165 | 221698_s_at | CLEC7A      | 6.122  |
| 219667_s_at | BANK1       | -6.147 | 202551_s_at | CRIM1       | 6.174  |
| 204971_at   | CSTA        | -6.137 | 203666_at   | CXCL12      | 6.201  |
| 219049_at   | CSGALNACT1  | -6.13  | 204066_s_at | AGAP1       | 6.228  |
| 201998_at   | ST6GAL1     | -5.816 | 44790_s_at  | C13orf18    | 6.246  |
| 206150_at   | CD27        | -5.799 | 204105_s_at | NRCAM       | 6.259  |
| 211990_at   | HLA-DPA1    | -5.789 | 220415_at   | TNNI3K      | 6.366  |
| 219926_at   | POPDC3      | -5.752 | 209803_s_at | PHLDA2      | 6.427  |
| 208683_at   | CAPN2       | -5.736 | 202350_s_at | MATN2       | 6.463  |
| 207734_at   | LAX1        | -5.673 | 203917_at   | CXADR       | 6.479  |
| 220129_at   | SOHLH2      | -5.534 | 207979_s_at | CD8B        | 6.512  |
| 202252_at   | RAB13       | -5.527 | 200606_at   | DSP         | 6.739  |
| 205671_s_at | HLA-DOB     | -5.512 | 212599_at   | AUTS2       | 6.791  |
| 200999_s_at | CKAP4       | -5.435 | 202677_at   | RASA1       | 6.806  |
| 213638_at   | PHACTR1     | -5.405 | 201445_at   | CNN3        | 6.812  |
| 202746_at   | ITM2A       | -5.381 | 204151_x_at | AKR1C1      | 6.908  |
| 209942_x_at | MAGEA3      | -5.351 | 204485_s_at | TOM1L1      | 6.909  |
| 203708_at   | PDE4B       | -5.323 | 219181_at   | LIPG        | 6.931  |
| 209366_x_at | CYB5A       | -5.277 | 212192_at   | KCTD12      | 7.011  |
| 203895_at   | PLCB4       | -5.25  | 221210_s_at | NPL         | 7.063  |
| 213170_at   | GPX7        | -5.208 | 205549_at   | PCP4        | 7.135  |
| 221297_at   | GPRC5D      | -5.158 | 209699_x_at | AKR1C2      | 7.169  |
| 201925_s_at | CD55        | -5.155 | 201667_at   | GJA1        | 7.485  |
| 221571_at   | TRAF3       | -5.155 | 210095_s_at | IGFBP3      | 7.581  |
| 219371_s_at | KLF2        | -5.132 | 206336_at   | CXCL6       | 7.688  |
| 205884_at   | ITGA4       | -5.09  | 205898_at   | CX3CR1      | 7.769  |
| 201952_at   | ALCAM       | -5.018 | 212094_at   | PEG10       | 7.778  |
| 206609_at   | MAGEC1      | -5.014 | 201427_s_at | SEPP1       | 8.534  |

Table 1: *(continued)*

| U133a ID    | Gene Symbol | Weight | U133a ID    | Gene Symbol | Weight |
|-------------|-------------|--------|-------------|-------------|--------|
| 203397_s.at | GALNT3      | -4.979 | 209348_s.at | MAF         | 8.855  |
| 202947_s.at | GYPC        | -4.966 | 209395_at   | CHI3L1      | 9.056  |
| 205632_s.at | PIP5K1B     | -4.953 | 209160_at   | AKR1C3      | 9.105  |
| 210889_s.at | FCGR2B      | -4.935 | 205336_at   | PVALB       | 9.142  |
| 209619_at   | CD74        | -4.926 | 211719_x.at | FN1         | 9.776  |
